# Supplementary material
Source: ML conference proceedings conference paper supplement (https://openreview.net/forum?id=kMmAYbT0VL)
Supplement: supplementary_material [file attachment]

---

# Point-Cloud Completion with Pretrained Text-to-image Diffusion Models - Supplementary Material -

---

Yoni Kasten<sup>1</sup>

Ohad Rahamim<sup>2</sup>

Gal Chechik<sup>1,2</sup>

<sup>1</sup>NVIDIA Research

<sup>2</sup>Bar-Ilan University

## 1 List of Textual Prompts

The text prompts for the Redwood shapes that we tested are presented in Table 1. For the KITTI dataset, we used the text "A \*", where "\*" denotes the shape class: "car", "truck" or "motorcycle".

## 2 Broader Impact

Our approach uses the SDS loss that builds on a text-to-image diffusion model [2]. As such, it inherits possible biases that such a model may have.

## References

- [1] S. Choi, Q.-Y. Zhou, S. Miller, and V. Koltun. A large dataset of object scans. *arXiv preprint arXiv:1602.02481*, 2016.
- [2] R. Rombach, A. Blattmann, D. Lorenz, P. Esser, and B. Ommer. High-resolution image synthesis with latent diffusion models. In *Proceedings of the IEEE/CVF Conference on Computer Vision and Pattern Recognition*, pages 10684–10695, 2022.

| Scan ID | Scan name         | Text Prompt                               |
|---------|-------------------|-------------------------------------------|
| 08712   | Plant in a vase 2 | "A plant"                                 |
| 06912   | Bench             | "A bench"                                 |
| 05492   | Standing sign     | "A standing sign"                         |
| 05456   | Park trash can    | "Park trash can"                          |
| 01373   | Picnic table      | "A picnic table"                          |
| 00034   | Sofa              | "A sofa"                                  |
| 01184   | Trash can         | "An outdoor trash can with wheels"        |
| 06127   | Plant in a vase   | "A plant in a large vase"                 |
| 06830   | Tricycle          | "Children's tricycle with adult's handle" |
| 07306   | Office trash      | "An office trash can"                     |
| 05452   | Outside chair     | "An a outside chair"                      |
| 06145   | One leg table     | "A one leg square table"                  |
| 05117   | Old chair         | "An old chair"                            |
| 09639   | Executive chair   | "An executive chair"                      |
| 06188   | Vespa             | "A motorcycle"                            |
| 07136   | Couch             | "A couch"                                 |
| 08754   | Teapot            | "A teapot"                                |
| 09664   | Traffic cone      | "A traffic cone"                          |
| 04797   | Street faucet     | "A street faucet"                         |
| 02426   | Clothes iron      | "A clothes iron"                          |
| 09424   | Backpack          | "A backpack"                              |
| 04014   | Lamp              | "A lamp"                                  |
| 04210   | Blobe             | "A globe"                                 |
| 06271   | Vase              | "A vase"                                  |
| 04154   | Fire extinguisher | "A fire extinguisher"                     |
| 00030   | Vase 2            | "A vase"                                  |
| 09484   | Rocking horse     | "A rocking horse"                         |
| 04919   | Duck spring swing | "A duck spring swing"                     |
| 06177   | Printer           | "A printer"                               |
| 04457   | Vacuum cleaner    | "Vacuum cleaner"                          |
| 06124   | Vase 3            | "A vase"                                  |
| 09488   | Basketball        | "A basketball"                            |

Table 1: Scan IDs from the Redwood dataset [1], and their corresponding textual prompts.
